# Supplementary material for: Analysis of the Characteristics and Causes of Land Degradation and Development in Coastal China (1982–2015)
Source: MDPI journal article supplement (doi:10.3390/rs15092249), 2023-04-24
Supplement: s1 [file s1]

## Supplementary Material

### CONTENTS:

**Table S1** LDD processes in coastal China.

**Table S2** The change in effects of human activities on LDD.

**Table S3** Classification standard of LDD types.

**Table S4** Pearson correlation coefficients between LDDI and different extreme temperature indices.

**Table S5** Pearson correlation coefficients between LDDI and different extreme precipitation indices.

**Table S6** Summary of the planned timeframe, aims, and objectives of major Chinese sustainability programmes.

**Table S7** Ratio (%) of land cover conversions from 1985 to 2015.

**Figure S1** Multi-year average of normalized NDVI values.

**Figure S2** Multi-year average of normalized GPP values.

**Figure S3** The proportion of different LDD change types among different LULC types. (Deg and Dev represent land degradation and land development, respectively. Sig, Sli, and Non<sub>sig</sub> represent LDD changes with significant, slight, and no changes. Values less than 0.00001 are represented as 0.)

**Figure S4** Heat map of the ratio (%) of LULC types transfer out and transfer in different provinces.

**Table S1** LDD processes in coastal China.

| Slope of LDDI                     | Z value            | LDD Types               |
|-----------------------------------|--------------------|-------------------------|
| $\text{Slope} \leq -0.0005$       | $Z \leq -1.96$     | Significant degradation |
| $\text{Slope} \leq -0.0005$       | $-1.96 < Z < 1.96$ | Slight degradation      |
| $-0.0005 < \text{Slope} < 0.0005$ | $-1.96 < Z < 1.96$ | Nonsignificant change   |
| $\text{Slope} \geq 0.0005$        | $-1.96 < Z < 1.96$ | Slight development      |
| $\text{Slope} \geq 0.0005$        | $Z > 1.96$         | Significant development |

**Table S2** The change in effects of human activities on LDD.

| Slope of Residual                 | Significance Level | LDD Types             |
|-----------------------------------|--------------------|-----------------------|
| $\text{Slope} \leq -0.0005$       | $P \leq -1.96$     | Significant decrease  |
| $\text{Slope} \leq -0.0005$       | $-1.96 < P < 1.96$ | Slight decrease       |
| $-0.0005 < \text{Slope} < 0.0005$ | $-1.96 < P < 1.96$ | Nonsignificant change |
| $\text{Slope} \geq 0.0005$        | $-1.96 < P < 1.96$ | Slight increase       |
| $\text{Slope} \geq 0.0005$        | $P > 1.96$         | Significant increase  |

**Table S3** Classification standard of LDD types.

| <b>Types</b>                        | <b>LDDI's<br/>Trend</b> | <b>Change</b> | <b>Significance Level of<br/>Regression Model<br/>between LDDI and<br/>Climate Factors</b> | <b>Significant Level of<br/>Residual's Slope</b> |
|-------------------------------------|-------------------------|---------------|--------------------------------------------------------------------------------------------|--------------------------------------------------|
| Development induced<br>by CC        | Significant increase    |               | $p < 0.05$                                                                                 | $p > 0.05$                                       |
| Degradation induced<br>by CC        | Significant decrease    |               | $p < 0.05$                                                                                 | $p > 0.05$                                       |
| Development induced<br>by HA        | Significant increase    |               | $p > 0.05$                                                                                 | $p < 0.05$                                       |
| Degradation induced<br>by HA        | Significant decrease    |               | $p > 0.05$                                                                                 | $p < 0.05$                                       |
| Development induced<br>by CC and HA | Significant increase    |               | $p < 0.05$                                                                                 | $p < 0.05$                                       |
| Degradation induced<br>by CC and HA | Significant decrease    |               | $p < 0.05$                                                                                 | $p < 0.05$                                       |
| Natural development                 | Significant increase    |               | $p > 0.05$                                                                                 | $p > 0.05$                                       |
| Natural degradation                 | Significant decrease    |               | $p > 0.05$                                                                                 | $p > 0.05$                                       |

**Table S4** Pearson correlation coefficients between LDDI and different extreme temperature indices.

|       | LDDI    | FD      | SU      | TR      | TXx     | TNx     | TXn    | TNn    | TN10p   | TX10p   | TN90p   | TX90p   | WSDI   | CSDI    | DTR     |
|-------|---------|---------|---------|---------|---------|---------|--------|--------|---------|---------|---------|---------|--------|---------|---------|
| LDDI  | 1.00    | -0.52** | 0.29    | 0.50**  | 0.28    | 0.25    | 0.25   | 0.28   | -0.63** | -0.44** | 0.63**  | 0.43*   | 0.30   | -0.45** | -0.35*  |
| FD    | -0.52** | 1.00    | -0.35*  | -0.34*  | -0.53** | -0.31   | -0.13  | -0.30  | 0.63**  | 0.55**  | -0.64** | -0.63** | -0.41* | 0.41*   | 0.09    |
| SU    | 0.29    | -0.35*  | 1.00    | 0.11    | 0.10    | 0.20    | 0.04   | 0.18   | -0.57** | -0.51** | 0.46**  | 0.54**  | 0.34*  | -0.34   | -0.10   |
| TR    | 0.50**  | -0.34*  | 0.11    | 1.00    | 0.53**  | 0.56**  | -0.12  | -0.01  | -0.69** | -0.27   | 0.72**  | 0.52**  | 0.29   | -0.74** | -0.46** |
| TXx   | 0.28    | -0.53** | 0.10    | 0.53**  | 1.00    | 0.47**  | 0.10   | 0.23   | -0.54** | -0.21   | 0.60**  | 0.54**  | 0.36*  | -0.39*  | -0.31   |
| TNx   | 0.25    | -0.31   | 0.20    | 0.56**  | 0.47**  | 1.00    | -0.11  | 0.05   | -0.66** | -0.26   | 0.67**  | 0.55**  | 0.32   | -0.58** | -0.34   |
| TXn   | 0.25    | -0.13   | 0.04    | -0.12   | 0.10    | -0.11   | 1.00   | 0.66** | -0.06   | -0.26   | 0.05    | -0.07   | -0.09  | 0.21    | 0.17    |
| TNn   | 0.28    | -0.30   | 0.18    | -0.01   | 0.23    | 0.05    | 0.66** | 1.00   | -0.25   | -0.15   | 0.26    | 0.18    | 0.12   | 0.06    | 0.01    |
| TN10p | -0.63** | 0.63**  | -0.57** | -0.69** | -0.54** | -0.66** | -0.06  | -0.25  | 1.00    | 0.63**  | -0.82** | -0.68** | -0.36* | 0.81**  | 0.44**  |
| TX10p | -0.44** | 0.55**  | -0.51** | -0.27   | -0.21   | -0.26   | -0.26  | -0.15  | 0.63**  | 1.00    | -0.44** | -0.38*  | 0.02   | 0.53**  | -0.06   |
| TN90p | 0.63**  | -0.64** | 0.46**  | 0.72**  | 0.60**  | 0.67**  | 0.05   | 0.26   | -0.82** | -0.44** | 1.00    | 0.78**  | 0.54** | -0.56** | -0.49** |
| TX90p | 0.43*   | -0.63** | 0.54**  | 0.52**  | 0.54**  | 0.55**  | -0.07  | 0.18   | -0.68** | -0.38*  | 0.78**  | 1.00    | 0.75** | -0.44*  | -0.05   |
| WSDI  | 0.30    | -0.41*  | 0.34*   | 0.29    | 0.36*   | 0.32    | -0.09  | 0.12   | -0.36*  | 0.02    | 0.54**  | 0.75**  | 1.00   | -0.17   | -0.12   |
| CSDI  | -0.45** | 0.41*   | -0.34   | -0.74** | -0.39*  | -0.58** | 0.21   | 0.06   | 0.81**  | 0.53**  | -0.56** | -0.44*  | -0.17  | 1.00    | 0.35*   |
| DTR   | -0.35*  | 0.09    | -0.10   | -0.46** | -0.31   | -0.34   | 0.17   | 0.01   | 0.44**  | -0.06   | -0.49** | -0.05   | -0.12  | 0.35*   | 1.00    |

Note: \*\* indicates significant correlation at the 0.01 level; \* indicates significant correlation at the 0.05 level.

**Table S5** Pearson correlation coefficients between LDDI and different extreme precipitation indices.

|         | LDDI   | Rx1day | Rx5day | SDII   | R10    | R20    | CDD   | CWD    | R95p   | R99p   | PRCPTOT |
|---------|--------|--------|--------|--------|--------|--------|-------|--------|--------|--------|---------|
| LDDI    | 1.00   | 0.05   | 0.02   | 0.41*  | 0.46** | -0.05  | -0.15 | 0.31   | 0.44*  | 0.04   | 0.30    |
| Rx1day  | 0.05   | 1.00   | 0.56** | 0.45** | 0.48** | 0.67** | 0.06  | 0.04   | 0.62** | 0.73** | 0.29    |
| Rx5day  | 0.02   | 0.56** | 1.00   | 0.50** | 0.55** | 0.62** | -0.16 | 0.22   | 0.63** | 0.71** | 0.46**  |
| SDII    | 0.41*  | 0.45** | 0.50** | 1.00   | 0.73** | 0.41*  | 0.07  | 0.44** | 0.76** | 0.56** | 0.64**  |
| R10     | 0.46** | 0.48** | 0.55** | 0.73** | 1.00   | 0.37*  | 0.01  | 0.30   | 0.84** | 0.53** | 0.68**  |
| R20     | -0.05  | 0.67** | 0.62** | 0.41*  | 0.37*  | 1.00   | 0.10  | 0.07   | 0.56** | 0.81** | 0.30    |
| CDD     | -0.15  | 0.06   | -0.16  | 0.07   | 0.01   | 0.10   | 1.00  | -0.25  | -0.10  | -0.08  | -0.18   |
| CWD     | 0.31   | 0.04   | 0.22   | 0.44** | 0.30   | 0.07   | -0.25 | 1.00   | 0.28   | 0.20   | 0.55**  |
| R95p    | 0.44*  | 0.62** | 0.63** | 0.76** | 0.84** | 0.56** | -0.10 | 0.28   | 1.00   | 0.72** | 0.70**  |
| R99p    | 0.04   | 0.73** | 0.71** | 0.56** | 0.53** | 0.81** | -0.08 | 0.20   | 0.72** | 1.00   | 0.51**  |
| PRCPTOT | 0.30   | 0.29   | 0.46** | 0.64** | 0.68** | 0.30   | -0.18 | 0.55** | 0.70** | 0.51** | 1.00    |

Note: \*\* indicates significant correlation at the 0.01 level; \* indicates significant correlation at the 0.05 level

**Table S6** Summary of the planned timeframe, aims, and objectives of major Chinese sustainability programmes.

| Sustainability programmes                                                       | Planned timeframe | Aims and objectives                                                                                                                                                                                                                                                                              |
|---------------------------------------------------------------------------------|-------------------|--------------------------------------------------------------------------------------------------------------------------------------------------------------------------------------------------------------------------------------------------------------------------------------------------|
| Shelterbelt Development Program—Three North                                     | 1978–2050         | Control the expansion of sandy/desertified land, and mitigate wind erosion of sand/soil and dust storms in northern China via forest plantation, mountain closure, and sandy area regeneration.                                                                                                  |
| Soil and Water Conservation Program—National                                    | 1983–2017         | Control soil erosion; improve farmers' livelihoods; and improve agricultural production, ecology, and the environment by combining prevention, protection, control, repair and ecological regeneration, and utilizing appropriate scientific, engineering, plantation and cultivation measures.  |
| Shelterbelt Development Program—Five Regions                                    | 1987–2020         | Arrest environmental deterioration in the Yangtze River, Pearl River, their coastal areas, the Plain, and the Taihang Mountains via artificial plantation, mountain closure, aerial seeding, improving low-yielding forest and establishing shelterbelts.                                        |
| Comprehensive Agricultural Development Program                                  | 1988–2020         | Raise rural quality of life, incomes and food security through land reform, land management, ecological construction, agricultural infrastructure and industry development, and production/efficiency gains using science and technology.                                                        |
| Soil and Water Conservation Program—Yangtze National Land Consolidation Program | 1989–indefinite   | Reduce sedimentation and improve the health of the Yangtze River, ensure the safe operation of the Three Gorges Reservoir, and enhance regional economic and social development by controlling soil erosion in the upper reaches.                                                                |
| Natural Forest Conservation Program                                             | 1997–2020         | Increase the area of cultivated land and revenues via consolidation (reorganizing and merging fragmented and underused land), reclamation, constructing high-quality cropland, and improving land use and management.                                                                            |
| Grain for Green Program                                                         | 1998–2020         | Halt logging/deforestation and protect natural forests for ecological/carbon benefits via mountain closure, aerial seeding and artificial planting. Create new business opportunities for traditional forest enterprises; create forest management jobs and relocate redundant forestry workers. |
| Fast-growing and High-yielding Timber Program                                   | 1999–2020         | Prevent soil erosion, mitigate flooding, store carbon, and improve livelihoods by increasing forest and grassland cover on cropped hillslopes and converting cropland, barren hills and wasteland to forest.                                                                                     |
| Forest Ecosystem Compensation Fund                                              | 2001–2015         | Remedy the decline in timber supply and meet domestic demand for forest resources without affecting natural forests via the establishment of fast-growing and high-yielding timber plantations.                                                                                                  |
| Sandification Control Program—Beijing/Tianjin                                   | 2001–2016         | Conserve natural forests and protect species and ecosystems via restoration, protection, and management of forests that have important ecological, biodiversity conservation, and sustainable economic and social value.                                                                         |
| Wildlife Conservation and Nature Protection Program                             | 2001–2022         | Reduce desertification and dust storms, and improve the environment in the Beijing/Tianjin area via reforestation, grassland management, and water conservation, relocating affected people and establishing basic governance of desertified lands.                                              |
| Rocky Desertification Treatment Program                                         | 2001–2050         | Conserve key wild animal and plant species and natural ecosystems by expanding the number and area of nature reserves, and promoting sustainable development.                                                                                                                                    |
| Grassland Ecological Protection Program                                         | 2008–2020         | Curb rocky/karst desertification, improve the environment, and increase incomes by protecting and establishing vegetation, promoting sustainable land-use, farmland construction, water conservation and relocating poor people.                                                                 |
| Cultivated Land Quality Program                                                 | 2011–2020         | Mitigate grassland degradation by grazing prohibition and enhancing grassland vegetation coverage/biomass. Increase herder incomes by promoting the sustainable development of pastoral areas.                                                                                                   |
|                                                                                 | 2015–2030         | Enhance food security and the quality, safety and ecological sustainability of agricultural production by addressing soil acidification, salinization, nutrient imbalances, pollution, biota, fertility and shallow topsoil.                                                                     |

**Note:** the above statistics derived from: <https://www.nature.com/articles/s41586-018-0280-2#citeas>.

**Table S7** Ratio (%) of land cover conversions from 1985 to 2015

|             |                   | 2015     |        |       |           |       |        |            |         | Total        |
|-------------|-------------------|----------|--------|-------|-----------|-------|--------|------------|---------|--------------|
|             |                   | Cropland | Forest | Shrub | Grassland | Water | Barren | Impervious | Wetland | transfer out |
| <b>1985</b> | Cropland          | -        | 18.61  | 0.06  | 5.11      | 5.26  | 0.06   | 34.13      | 0       | 63.24        |
|             | Forest            | 14.50    | -      | 0.78  | 0.19      | 0.11  | 0.002  | 1.14       | 0       | 16.72        |
|             | Shrub             | 0.32     | 3.03   | -     | 0.18      | 0     | 0      | 0.001      | 0       | 3.53         |
|             | Grassland         | 4.49     | 6.83   | 0.25  | -         | 0.17  | 0.04   | 0.71       | 0       | 12.50        |
|             | Water             | 1.06     | 0.16   | 0     | 0.02      | -     | 0.03   | 1.07       | 0       | 2.34         |
|             | Barren            | 0.18     | 0.002  | 0     | 0.02      | 0.31  | -      | 0.33       | 0       | 0.84         |
|             | Impervious        | 0.14     | 0.003  | 0     | 0         | 0.68  | 0.01   | -          | 0       | 0.83         |
|             | Wetland           | 0.002    | 0      | 0     | 0         | 0.001 | 0      | 0          | -       | 0.00         |
|             | Total transfer in | 20.69    | 28.64  | 1.09  | 5.52      | 6.53  | 0.15   | 37.38      | 0.00    |              |

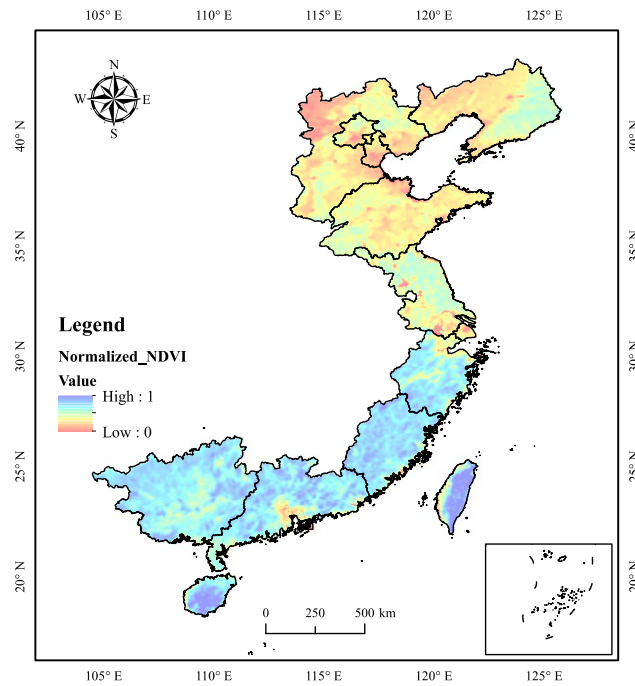

Figure S1 Multi-year average of normalized NDVI values.

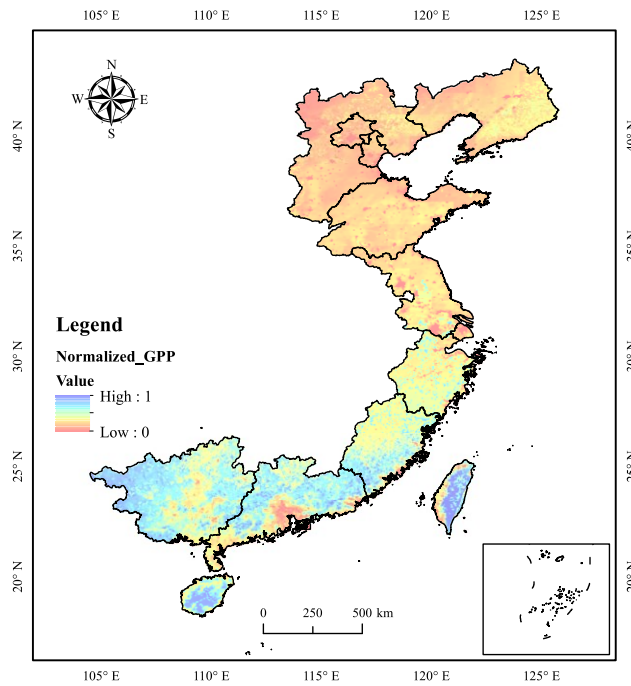

**Figure S2** Multi-year average of normalized GPP values.

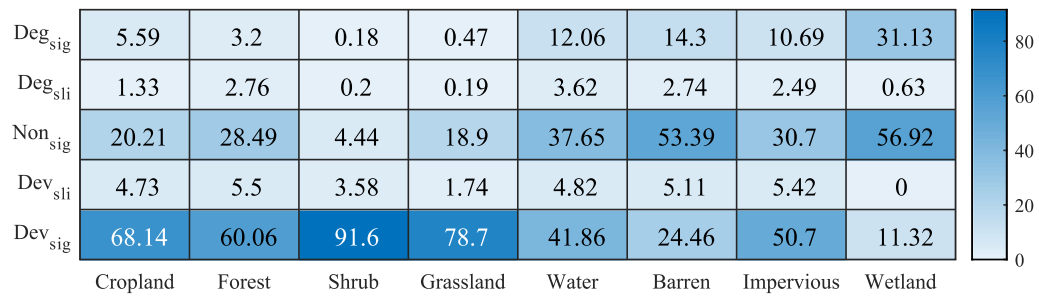

**Figure S3** The proportion of different LDD change types among different LULC types. (Deg and Dev represent land degradation and land development, respectively. Sig, Sli, and Non<sub>sig</sub> represent LDD changes with significant, slight, and no changes. Values less than 0.00001 are represented as 0.)

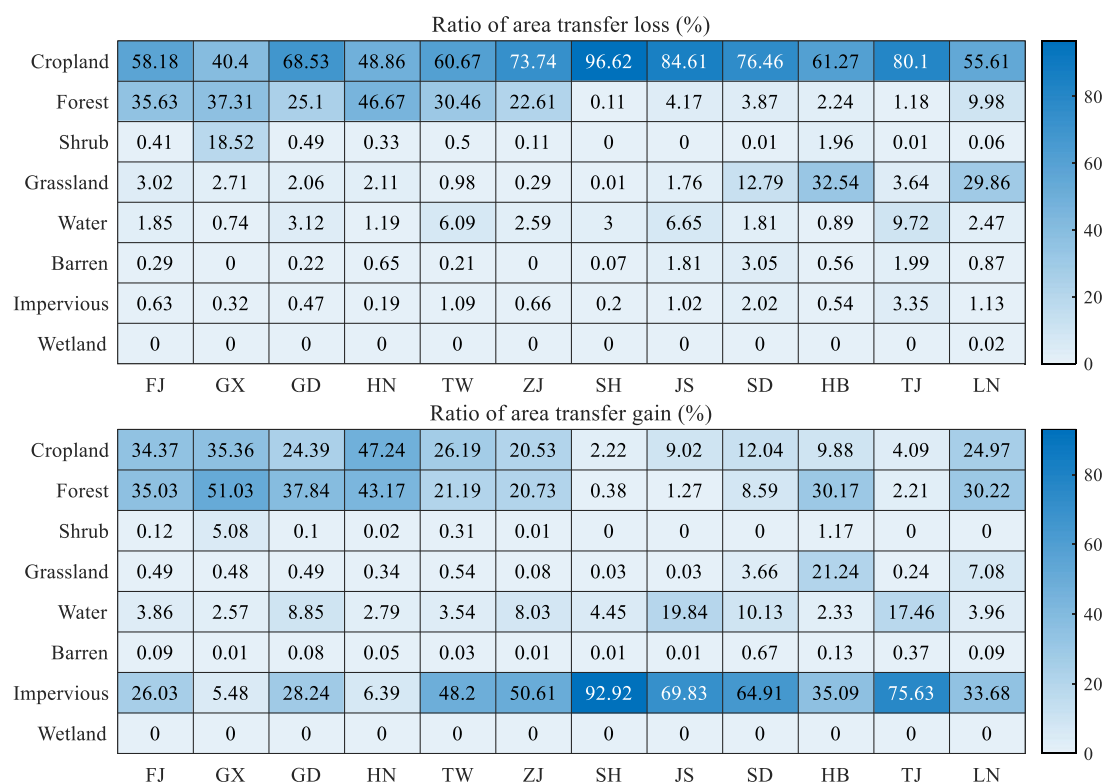

**Figure S4** Heat map of the ratio (%) of LULC types transfer out and transfer in different provinces.
